# Supplementary material
Source: Springer Nature journal article supplement (https://www.springermedizin.de/resource/supplementary/12889_2007_979_MOESM2_ESM.pdf/9503240)
Supplement: MOESM2 [file 9503240]

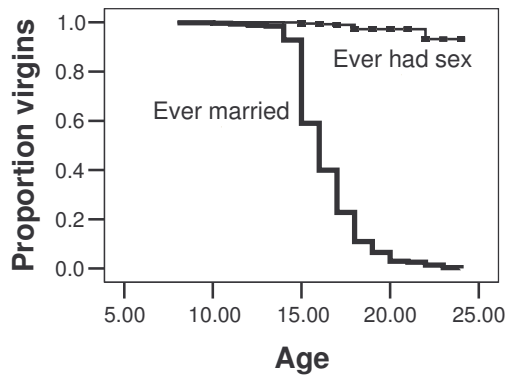

Figure-2 Kaplan-Meier indicating young women who were ever-married and who ever had sex and age at sexual debut in Butajira, Ethiopia
